# Supplementary material for: The novel iminium surfactant p-benzylidene benzyldodecyl iminium chloride as a corrosion inhibitor for plain carbon steel in 1 M HCl: electrochemical and DFT evaluation
Source: Royal Society of Chemistry journal article supplement (doi:10.1039/c6ra28426d), 2017-01-01
Supplement: c6ra28426d1.pdf [file c6ra28426d1.pdf]

### Supplementary Figure Captions

---

|                  |                                                                                            |
|------------------|--------------------------------------------------------------------------------------------|
| <b>Fig.1S(1)</b> | Molecular structure of p-benzylidene benzyl dodecyl iminium chloride                       |
| <b>Fig.1S</b>    | Comparison of the natural charges of atoms in neutral, cation and anion molecular geometry |
| <b>Fig.2S</b>    | Comparison of the natural charges of atoms in neutral, cation and anion molecular geometry |

---

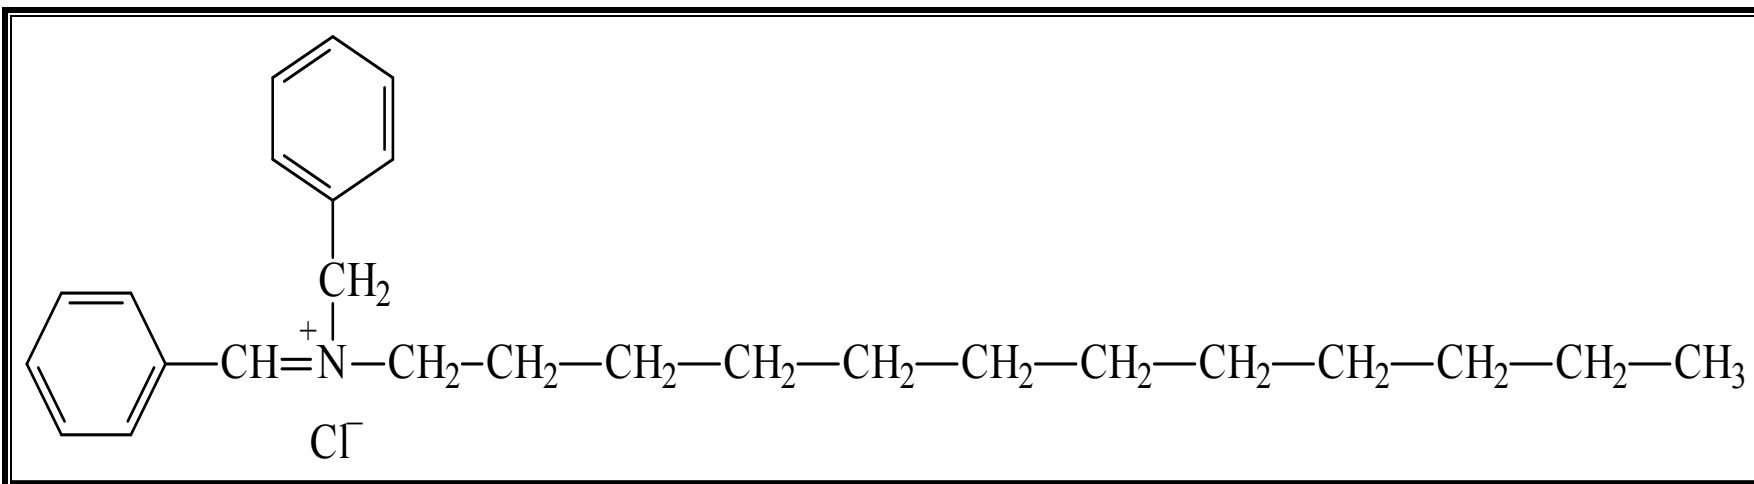

Fig.1S1

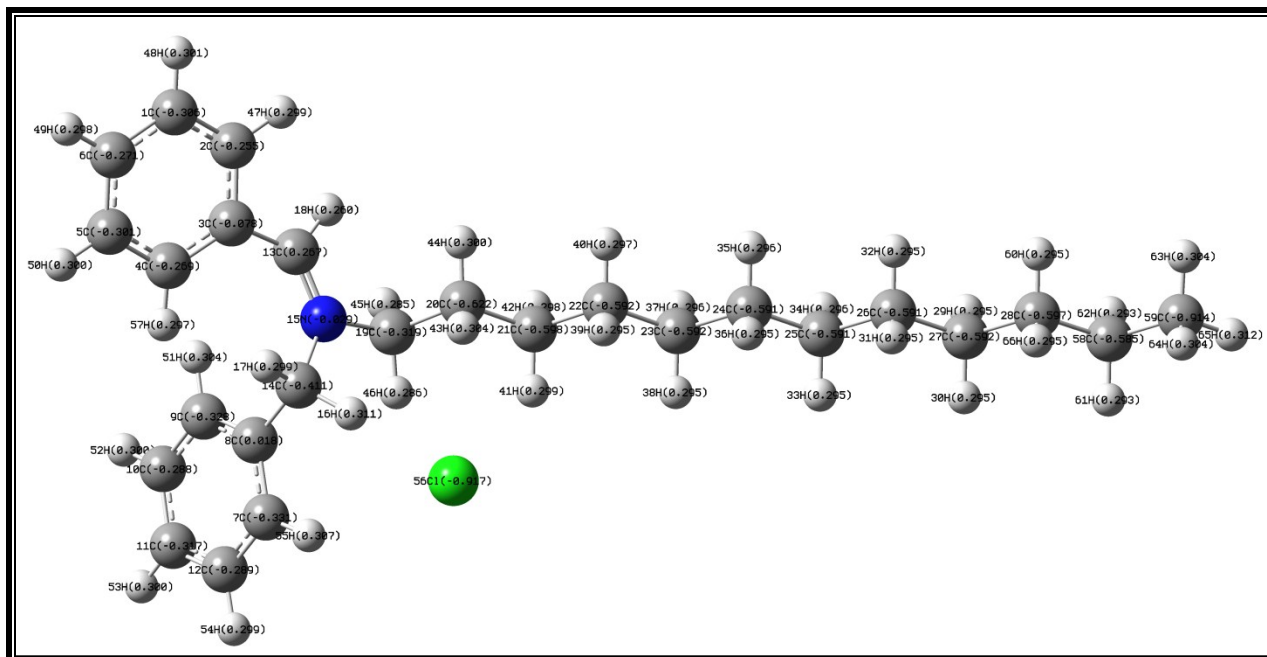

Fig.1S

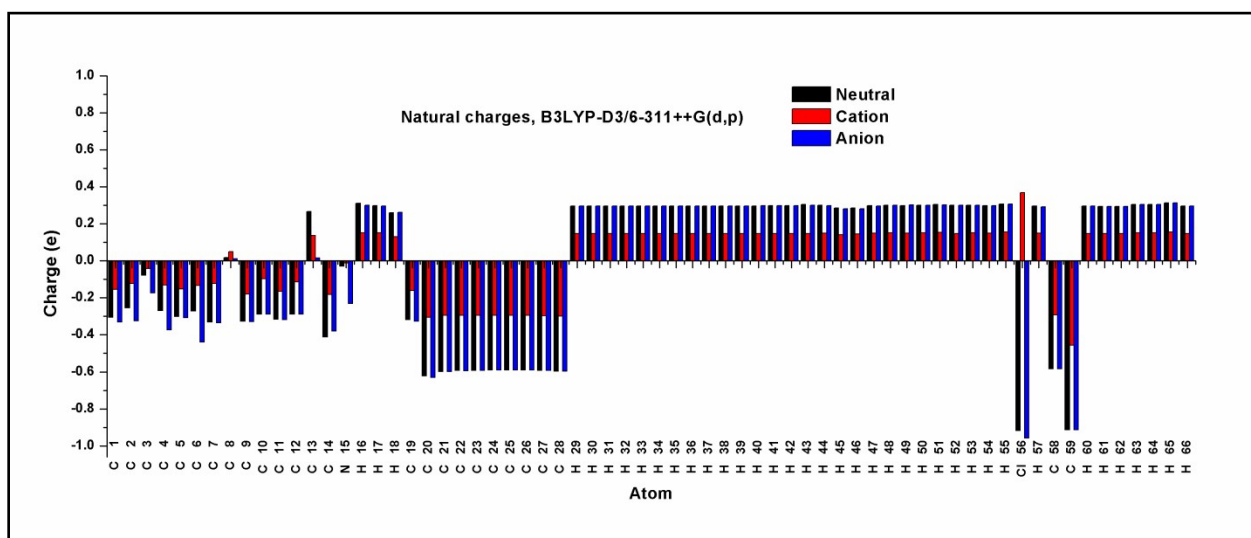

Fig. 2S
